# Supplementary material for: Some misunderstandings in psychology about confidence intervals
Source: Front Psychol. 2022 Jul 22;13:948423. doi: 10.3389/fpsyg.2022.948423 (PMC9355556; doi:10.3389/fpsyg.2022.948423)
Supplement: Supplementary file 1 [file Table_1.XLSX]

## Sheet: Survey
	Authors	Year	Title	Distribution
1	Smithson, M. J.	2000	Statistics with Confidence : An Introduction for Psychologists	T, Normal
2	Bakeman, R., & Robinson, B. F.	2005	Understanding Statistics in the Behavioral Sciences	T, Normal
3	Field, A.	2005	Discovering Statistics Using SPSS (2nd ed.)	Normal
4	Miles, J., & Banyard, P.	2007	Understanding and Using Statistics in Psychology: A Practical Introduction	T
5	Kirk, R. E.	2008	Statistics: An Introduction (5th ed.)	T
6	Coolican, H.	2009	Research Methods and Statistics in Psychology (5th ed.)	Normal
7	Goodwin, C. J.	2010	Research in Psychology: Methods and Design (6th ed.)	T
8	Myers, J. L., Well, A. D., Lorch Jr. R. F., Woolley, T. Kimmins, S., Harrison, R., & Harrison, P.	2010	Research Design and Statistical Analysis (3rd ed.)	Normal
9	Howitt, D., & Cramer, D.	2011	Introduction to Research Methods in Psychology (3rd ed.)	T, Normal
10	Pathak, R. P.	2011	Statistics in Education and Psychology	T, Normal
11	Welkowitz, J., Cohen, B. H., & Lea, R. B.	2011	Introductory Statistics for the Behavioral Sciences	T, Normal
12	Ware, W. B., Ferron, J. M., & Miller, B. M.	2012	Introductory Statistics: A Conceptual Approach Using R	T, Normal
13	Cohen, B. H.	2013	Explaining psychological statistics (4th ed.)	T, Normal
14	Cumming, G.	2013	Understanding the New Statistics: Effect Sizes, Confidence Intervals, and Meta-analysis	T, Normal
15	Aron, A., Aron, E., & Copus, E.	2014	Statistics for Psychology: Pearson New International Edition (6th ed.)	Normal
16	de Winter, P., & Cahusac, P. M. B.	2014	Starting Out in Statistics: An Introduction for Students of Human Health, Disease, and Psychology	T
17	Haslam, S. A., McGarty, C.	2014	Research Methods and Statistics in Psychology (2nd ed.)	T
18	Verma, J. P.	2019	Statistics and Research Methods in Psychology with Excel	T, Normal
19	Watt, R., & Collins, E.	2019	Statistics for Psychology: A Guide for Beginners (and Everyone Else)	Normal
20	Quirk, T. J.	2020	Excel 2019 for Educational and Psychological Statistics: A Guide to Solving Practical Problems (2nd ed.)	T, Normal
